# Supplementary material
Source: publisher figshare collection journal article supplement (https://geolsoc.figshare.com/ndownloader/files/34106104)
Supplement: Supplementary file 1 [file 34106104]

function [Msim,dsim,Fcsim,Dsim,tsim] = fcas5(Fw,fFw,Fm,fFm,Fp,km,fFcm,Fcm,dw,dm,d0,D0,fD,a,b,Mm,M0,nt,dt,fcswitch)

% fcas6.m: function form of the carbonate associated sulfur model
% from Kaufman, Wing, Xiao, Varni, Xiao, Okubo.
%
% [Msim,dsim,Fcsim,Dsim,tsim] = fcas5(Fw,fFw,Fm,fFm,Fp,km,fFcm,Fcm,dw,dm,d0,D0,fD,a,b,Mm,M0,nt,dt,fcswitch)
% with
% 
% Fw = modern weathering mass flux
% fFw = Ediacaran fraction of modern weathering mass flux Fw
% Fm = modern mid ocean ridge mass flux
% fFm = Ediacaran fraction of modern mid ocean ridge mass flux Fm
% Fp = Pyrite flux
% km = Scaling of modern Mo for Michaelis-Menten modeling Fc=f(M)
% Fcm is modern Fc, as equal to Fp (fFcFp*Fp from parameters)
% k = growth rate of Fc in logistic growth form of Fc(M) calculation
% 
% dw = isotopic composition of weathered mass flux
% dm = isotopic composition of mid ocean ridge mass flux
% d0 = initial d at base of SLF 
% D = d34S_sulfate - d34S_pyrite
% M0 = modern initial Sulfur mass
% fM0 = Ediacaran fraction of initial sulfur mass
% a,b are coefficients of regression for D(M)=aln(M/Mo) + b 
% nt = number of temporal simulation points
% dt = time interval (My)
% 
% fcswitch: Fc= constant multiple of modern Fc; or Fc=f(M); 
% fcswitch=1;% Fcsim,D formulation: constant fraction fFcm of modern, Fcm
% fcswitch=2; % Fcsim,D formulation: Michaelis-Menten and log dependence
%
% 
% outputs: 
% 
% Msim = simulated M vs time
% dsim = simulated delta34S vs time
% Fcsim = simulated carbonate flux vs time
% Dsim = simulated d34S_sulfate - d34S_pyrite vs time
% tsim = simulated time, equal time steps of dt from dt to nt*dt
%
% recoded from the spreadsheet: ModelCalculation.xlsx, 28 Jan 2021 MNE
% parameters are in script: params6.m
% required function: rk4.m (4th order Runge Kutta solver)
% can be run with script: run_fcas6.m    
% based on: coding for GEOL 345/645 MNE 2013-2021 mnevans@umd.edu
%
% revised 28 May 2021 MNE for Fc = f(M,K) for nonlinear dependence, per
% discussion with Shuhai Xiao, A Jay Kaufman, Juliana Okubo, 28 May 2021
% 
% revised 11 June 2021 MNE for Fc=f(M) per Shuhai Xiao, leaving Fp constant
% ODEs for the box model are:
%
% revised 21 June 2021 MNE for Fc=fFc*Fcm and Fc=f(M), leaving Fp constant
%
% (1) dM/dt=Fw + Fm - fFcm*Fcm - Fp [ Fc is a constant fraction of Fcm]
% or
% with SX's formulation, via Mills et al (2013), 
% www.pnas.org/cgi/doi/10.1073/pnas.1400547111 , as:
%
% (2) Fc = M*Fc0/(km*M0 + M), dynamic, with 
%
% km = Michaelis-Menten parameter: km*M is the mass at which Fc is 1/2 of 
% its maximum possible value
%
% M0 = initial mass (already defined in params)
%
% (3) Dsim(i)=a*log(Msim(i)/M0)+b;
%
% (4) dd/dt = ((dw-d)*Fw+(dm-d)*Fm - Fc - Fp)/M [dynamic] 

% Create the simulation vectors M,d and t, of dimension nt
Msim=NaN(nt,1); Msim(1,1)=M0; % set initial M to M0
dsim=NaN(nt,1); dsim(1,1)=d0; % set initial d to d0
tsim=[dt:dt:dt*nt]; % time since base of SLF, in My
%Fcsim=NaN(nt,1); Fcsim(1,1)=Fcm; % set initial Fc to Fc0
Fcsim=NaN(nt,1); 
Fcsim(1,1)=fFcm*Fcm; % set initial Fc to a fraction of modern Fc
Dsim(1,1)=D0; % Dsim(1)=D0

% Simulate Fc, M and d using equations (1,2) and inputs,
% parameters, and the RK4 solver:

for i=2:nt % over the 1:nt timesteps of the simulation,

    if fcswitch==1,
      % Fc is a constant fraction of Fcm:
      Fcsim(i)=fFcm*Fcm;
    elseif fcswitch==2,
      % Michaelis-Menten Fc: (after Mills, 2013):
      Fcsim(i)=Fcm*Msim(i-1)/(km*M0+Msim(i-1));
    end

    % Msim:
    dMdt(i)=(fFw*Fw + fFm*Fm - Fcsim(i) - Fp); 
    % updated M is
    Msim(i)=Msim(i-1)+rk4(dMdt(i),dt);
       
    if fcswitch==1,
        % D=constant:
        Dsim(i)=D0;    
    elseif fcswitch==2,
        % D=f(M): D = a*ln(M/Mo)+b:
        Dsim(i)=a*log(Msim(i)/Mm)+b;
    end
    dddt(i)=((dw-dsim(i-1))*fFw*Fw + (dm-dsim(i-1))*fFm*Fm + fD*Dsim(i)*Fp)/Msim(i-1,1);
    % updated d is
    dsim(i,1)=dsim(i-1) + rk4(dddt(i),dt);       
    
end

return
